# Supplementary material
Source: ML conference proceedings conference paper supplement (https://openreview.net/forum?id=Kjl51A6Pe9)
Supplement: supplementary_material [file attachment]

---

# 3D Brain MRI Generation with a Clinically-Conditioned VAE-GAN and Diffusion-Driven Feature Sampling

---

Najmeh Mashhadi, Emmanouil Nikolakakis, Razvan Marinescu\*  
Department of Computer Science  
University of California, Santa Cruz

## Supplementary

Table S1: Training and inference runtimes for framework components.

| Model             | Batch Size (train) | Learning rate      | Epochs | Training Time | Inference Time<br>Per Sample (batch=1) |
|-------------------|--------------------|--------------------|--------|---------------|----------------------------------------|
| VAE-GAN           | 4                  | $1 \times 10^{-4}$ | 2000   | $\sim 62$ h   | 164 ms                                 |
| AD/CN Classifier  | 8                  | $1 \times 10^{-4}$ | 51     | $\sim 1$ h    | 151 ms                                 |
| Volume Regression | 8                  | $1 \times 10^{-4}$ | 56     | $\sim 1$ h    | 151 ms                                 |
| Diffusion Model   | 8                  | $5 \times 10^{-4}$ | 1000   | $< 1$ h       | 450 ms (500 steps)                     |

---

\*R. Marinescu is the corresponding author ([ramarine@ucsc.edu](mailto:ramarine@ucsc.edu)).

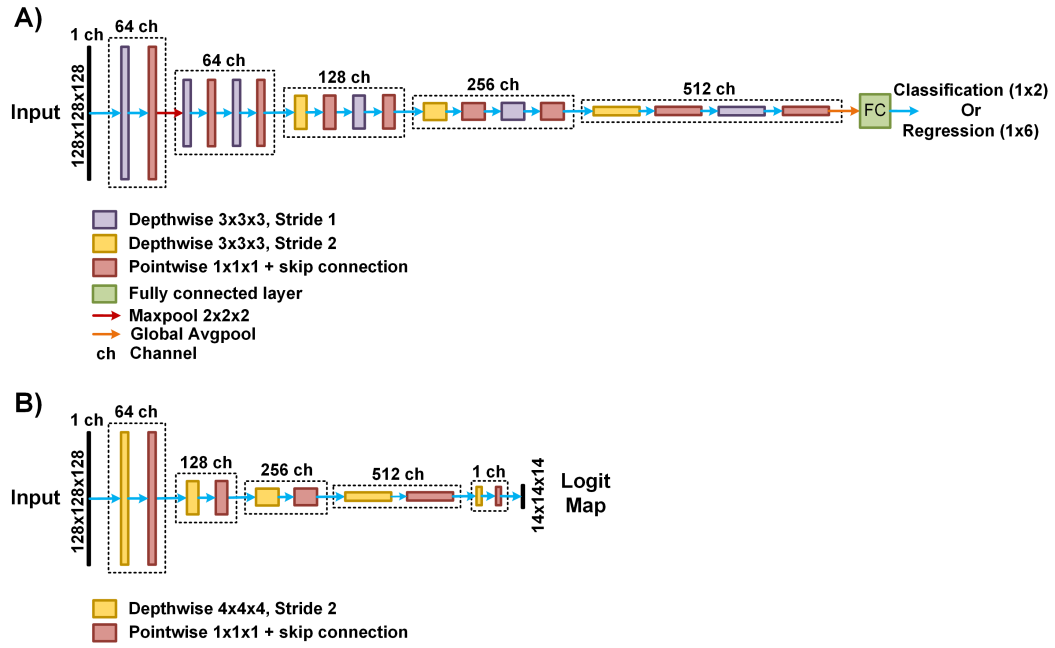

Figure S1: A) Schematic of the 3D depth-wise-separable ResNet head used for clinical supervision: stacks of depth-wise plus point-wise residual blocks with max-pool and global average pooling; A final FC outputs either two logits (AD/CN) or a 6-value volume vector. B) Schematic of the 3D PatchGAN discriminator: depth-wise blocks with residual connections down-sample the  $128^3$  input to a  $14 \times 14 \times 14$  logit map, so it checks realism patch by patch (one score per patch) across the whole 3D scan.
